# Supplementary material for: Mode selective dynamics and kinetics of the H2 + F2 → H + HF + F reaction
Source: Royal Society of Chemistry journal article supplement (doi:10.1039/c4cp03362k), 2014-01-01
Supplement: c4cp03362k1.pdf [file c4cp03362k1.pdf]

Electronic supplementary information for:

**Mode Selective Dynamics and Kinetics of the  $\text{H}_2 + \text{F}_2 \rightarrow \text{H} + \text{HF} + \text{F}$  Reaction**

Akira Matsugi\*<sup>a</sup> and Toshiyuki Takayanagi<sup>b</sup>

<sup>a</sup> *National Institute of Advanced Industrial Science and Technology (AIST), 16-1 Onogawa, Tsukuba, Ibaraki 305-8569, Japan. E-mail: a.matsugi@aist.go.jp*

<sup>b</sup> *Department of Chemistry, Saitama University, 255 Shimo-Okubo, Sakura-ku, Saitama City, Saitama 338-8570, Japan*

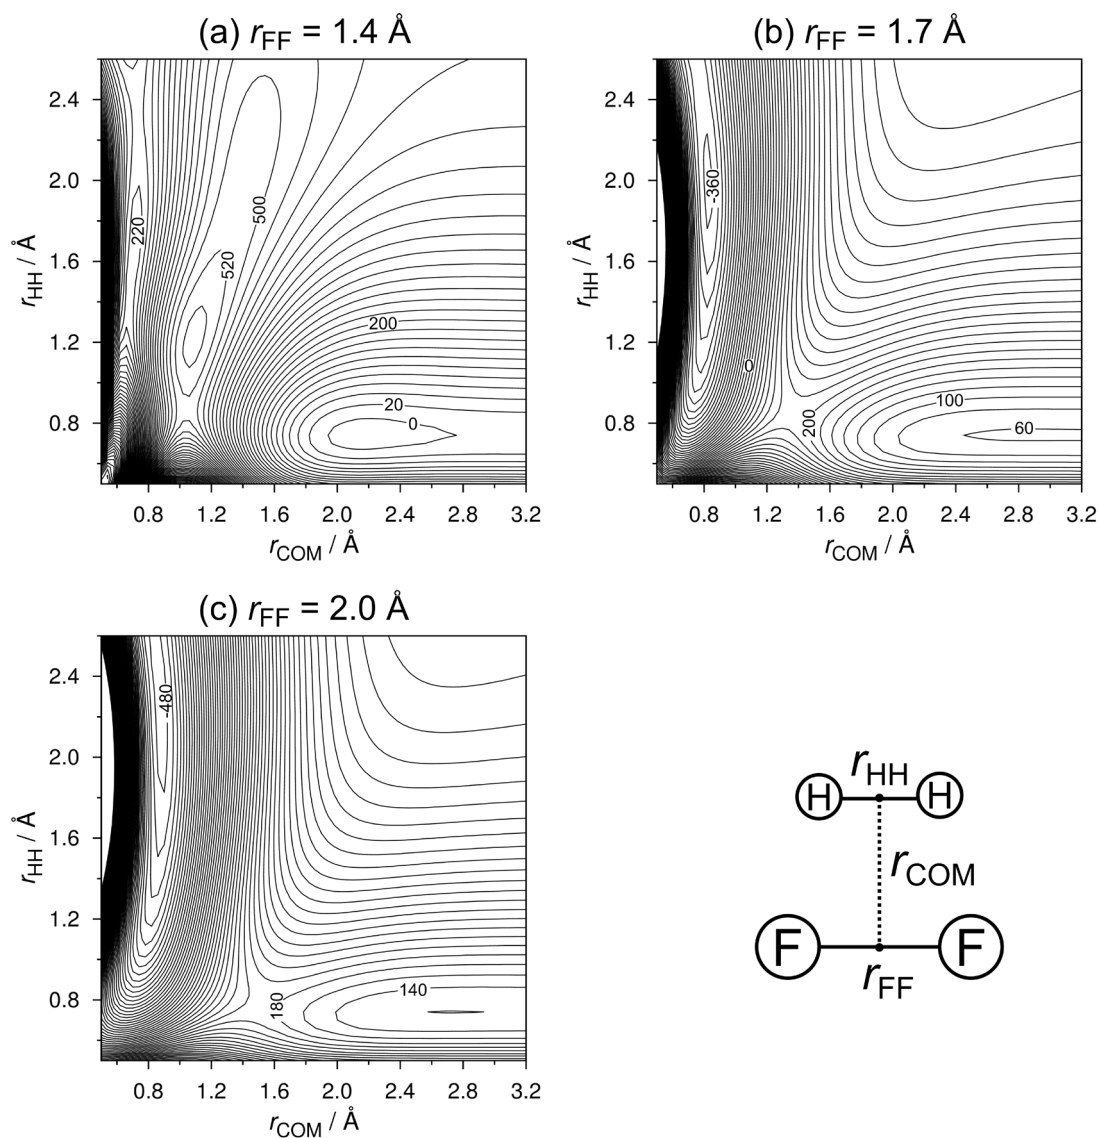

**Figure S1.** Equipotential contour plots of the  $\text{H}_2 + \text{F}_2$  reaction on the trapezoidal configuration. The contours are plotted as functions of the coordinates  $r_{\text{COM}}$  and  $r_{\text{HH}}$  with  $r_{\text{FF}}$  fixed at 1.4 (a), 1.7 (b), and 2.0 (c) Å. The energies shown are relative to the reactants and the contour increments are 20  $\text{kJ mol}^{-1}$ . These contours indicate a potential energy barrier of  $\sim 180 \text{ kJ mol}^{-1}$  for 2HF channel; however, the saddles shown in the figure are of higher order in the full-dimensional PES, and thus, not representing transition states.

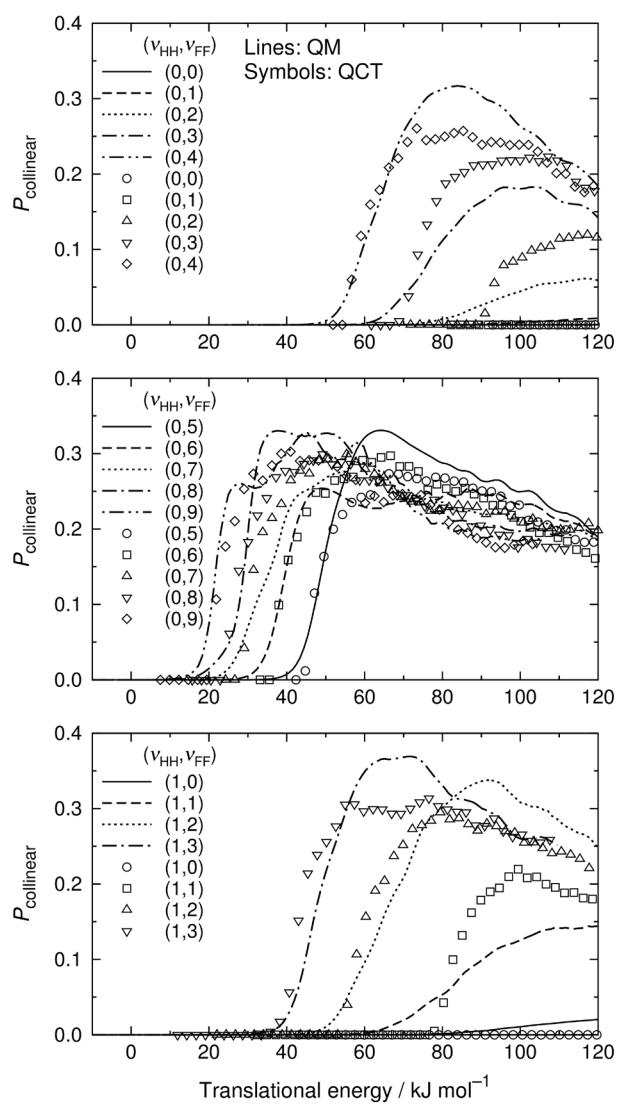

**Figure S2.** Collinear reaction probabilities for R1 as a function of the relative translational energy.
